# Supplementary material for: Determining the Effectiveness of Fibrin Sealants in Reducing Complications in Patients Undergoing Lateral Neck Dissection (DEFeND): A Randomised External Pilot Trial
Source: MDPI journal article supplement (doi:10.3390/cancers15205073), 2023-10-20
Supplement: s1 [file s1]

## SUPPLEMENTARY DATA S3. MISSING DATA AND POSSIBLE OUTLIERS

Summary of missing data by treatment arm

|                          | Variable                    | Interventional<br>arm | Control<br>arm | Unassigned | Total     |
|--------------------------|-----------------------------|-----------------------|----------------|------------|-----------|
| Baseline<br>Demographics | <b>Total</b>                | <b>26</b>             | <b>25</b>      | <b>2</b>   | <b>53</b> |
|                          | Hb                          | 3 (12%)               | 2 (8%)         | 0 (0%)     | 5 (10%)   |
|                          | Platelets                   | 3 (12%)               | 2 (8%)         | 0 (0%)     | 5 (10%)   |
|                          | White cells                 | 3 (12%)               | 3 (12%)        | 0 (0%)     | 6 (12%)   |
|                          | PT                          | 9 (35%)               | 8 (32%)        | 1 (50%)    | 17 (33%)  |
|                          | aPTT                        | 10 (38%)              | 8 (32%)        | 1 (50%)    | 18 (35%)  |
|                          | <b>Total</b>                | <b>25</b>             | <b>23</b>      |            | <b>48</b> |
| Drain                    | Drain<br>volume             | 0 (0%)                | 1 (4%)         | -          | 1 (2%)    |
| NDII                     | Follow-up 2                 | 1 (4%)                | 3 (13%)        | -          | 4 (8%)    |
| Surgery                  | Cutting<br>Instrument       | 0 (0%)                | 1 (4%)         | -          | 1 (2%)    |
|                          | Blood Loss                  | 0 (0%)                | 1 (4%)         | -          | 1 (2%)    |
|                          | Length of<br>Surgery        | 2 (8%)                | 3 (13%)        | -          | 5 (10%)   |
|                          | Time to<br>Reveal           | 0 (0%)                | 2 (9%)         | -          | 2 (4%)    |
|                          | Time to<br>Recovery<br>Room | 2 (8%)                | 2 (9%)         | -          | 4 (8%)    |

Summary of missing data by site

|                       | Variable           | Queen<br>Victoria<br>Hospital | Aintree<br>University<br>Hospital | Total     |
|-----------------------|--------------------|-------------------------------|-----------------------------------|-----------|
| Baseline Demographics | <b>Total</b>       | <b>7</b>                      | <b>46</b>                         | <b>53</b> |
|                       | Hb                 | 2 (29%)                       | 3 (7%)                            | 5 (10%)   |
|                       | Platelets          | 2 (29%)                       | 3 (7%)                            | 5 (10%)   |
|                       | White cells        | 3 (43%)                       | 3 (7%)                            | 6 (12%)   |
|                       | PT                 | 7 (100%)                      | 11 (24%)                          | 18 (33%)  |
|                       | aPTT               | 7 (100%)                      | 12 (26%)                          | 19 (35%)  |
|                       | <b>Total</b>       | <b>6</b>                      | <b>42</b>                         | <b>48</b> |
| Drain                 | Drain volume       | 0 (0%)                        | 1 (2%)                            | 1 (2%)    |
| NDII                  | Follow-up 2        | 1 (17%)                       | 3 (7%)                            | 4 (8%)    |
| Surgery               | Cutting Instrument | 0 (0%)                        | 1 (2%)                            | 1 (2%)    |
|                       | Blood Loss         | 0 (0%)                        | 1 (2%)                            | 1 (2%)    |
|                       | Length of Surgery  | 1 (17%)                       | 4 (10%)                           | 5 (10%)   |
|                       | Time to Reveal     | 0 (0%)                        | 2 (5%)                            | 2 (4%)    |

Summary of possible outliers by treatment arm

|                   | Covariate         | Severity | Interventional arm | Control arm | Total   |
|-------------------|-------------------|----------|--------------------|-------------|---------|
|                   | Total             |          | 25                 | 23          | 48      |
| Drain             | Volume            | Mild     | 0 (0%)             | 1 (4%)      | 1 (2%)  |
| Surgical Outcomes | Blood Loss        | Mild     | 2 (8%)             | 4 (17%)     | 6 (13%) |
|                   |                   | Severe   | 2 (8%)             | 0 (0%)      | 2 (4%)  |
|                   | Length of Surgery | Mild     | 0 (0%)             | 1 (4%)      | 1 (2%)  |
|                   |                   | Severe   | 1 (4%)             | 0 (0%)      | 1 (2%)  |
|                   | Time to Reveal    | Mild     | 0 (0%)             | 1 (4%)      | 1 (2%)  |
|                   |                   | Severe   | 0 (0%)             | 1 (4%)      | 1 (2%)  |
