# Supplementary material for: Determining the Effectiveness of Fibrin Sealants in Reducing Complications in Patients Undergoing Lateral Neck Dissection (DEFeND): A Randomised External Pilot Trial
Source: MDPI journal article supplement (doi:10.3390/cancers15205073), 2023-10-20
Supplement: s1 [file s1]

## **SUPPLEMENTARY DATA S4. Health economic analysis**

Relevant resource events for each patient were extracted from the CRF into a Microsoft Excel workbook. The extracted information included appointments with healthcare professionals, procedures performed, inpatient hospitalisation, and management of adverse events. Data on community healthcare resource use (e.g. district nurses, GP appointments) and patient absenteeism from work were not collected.

### **Resource Use**

1. Consultant clinic appointment as screening for trial
2. Day of surgery
3. Excess bed-days
4. Returns to theatre
5. Post-operative outpatient attendance, including unscheduled visits

### **Time in theatre**

As National Health Service (NHS) Reference Costs include the costs of theatre time in their estimates, adding additional costs based on time in surgery would double-count this element of resource use. Therefore, no costs have been added to the 'time in surgery' field.

The analysis was based on 2019/20 NHS tariffs.

**Table S1: Unit cost of resource use items**

| Resource                                                                                                                                                                   | Description                                                                                                                                                     | Unit cost | Source            |
|----------------------------------------------------------------------------------------------------------------------------------------------------------------------------|-----------------------------------------------------------------------------------------------------------------------------------------------------------------|-----------|-------------------|
| <b>Outpatient</b>                                                                                                                                                          |                                                                                                                                                                 |           |                   |
| Maxillo-Facial Surgery first visit                                                                                                                                         | Maxillo-Facial Surgery attendance – single professional; HRG code: WF01B                                                                                        | £147      | NHS tariff        |
| Maxillo-Facial Surgery follow-up visit                                                                                                                                     | Maxillo-Facial Surgery attendance – single professional; HRG code: WF01A                                                                                        | £66       | NHS tariff        |
| ENT first visit                                                                                                                                                            | ENT attendance – single professional; HRG code: WF01B                                                                                                           | £121      | NHS tariff[ref]   |
| ENT follow-up visit                                                                                                                                                        | ENT attendance – single professional; HRG code: WF01A                                                                                                           | £52       | NHS tariff[ref]   |
| <b>Surgery</b>                                                                                                                                                             |                                                                                                                                                                 |           |                   |
| T851 Block dissection of cervical lymph nodes                                                                                                                              | Major Neck Procedures with CC Score 0-1. Combined day and elective spell; HRG code: CA03B. Ordinary elective long stay trim point = 5 days                      | £3,157    | NHS tariff[ref]   |
| F382 Excision of lesion of mouth NEC; T851 Block dissection of cervical lymph nodes                                                                                        | Major Neck Procedures with CC Score 0-1. Combined day and elective spell; HRG code: CA03B. Ordinary elective long stay trim point = 5 days                      | £3,157    | NHS tariff[ref]   |
| E231 Open excision of lesion of pharynx; T851 Block dissection of cervical lymph nodes                                                                                     | Very Complex, Mouth or Throat Procedures, with CC Score 0-1. Combined day and elective spell; HRG code: CA80C. Ordinary elective long stay trim point = 26 days | £7,504    | NHS tariff        |
| T851 Block dissection of cervical lymph nodes; T81.0 Haemorrhage and haematoma complicating a procedure, not elsewhere classified                                          | Major Neck Procedures with CC Score 2+. Combined day and elective spell; HRG code: CA03A. Ordinary elective long stay trim point = 6 days                       | £3,815    | NHS tariff        |
| F382 Excision of lesion of mouth NEC; T851 Block dissection of cervical lymph nodes; T81.0 Haemorrhage and haematoma complicating a procedure, not elsewhere classified    | Major Neck Procedures with CC Score 2+. Combined day and elective spell; HRG code: CA03A. Ordinary elective long stay trim point = 6 days                       | £3,815    | NHS tariff        |
| E231 Open excision of lesion of pharynx; T851 Block dissection of cervical lymph nodes; T81.0 Haemorrhage and haematoma complicating a procedure, not elsewhere classified | Very Complex, Mouth or Throat Procedures, with CC Score 2-4. Combined day and elective spell; HRG code: CA80B. Ordinary elective long stay trim point = 32 days | £11,315   | NHS tariff        |
| Excess bed-day                                                                                                                                                             | Additional bed-day beyond ordinary elective long stay trim point                                                                                                | £265      | NHS tariff        |
| Artiss fibrin sealant                                                                                                                                                      | Combined cost of product and disposables                                                                                                                        | £98.23    | Baxter Healthcare |

ENT= Ear, Nose & Throat; HRG=health resource group

**Table S2: Number of resource use episodes and mean resource use per patient**

| Resource                                                                                                                                                                      | Interventional Arm (n=25) |              |                      | Control Arm (n=23) |              |                      |
|-------------------------------------------------------------------------------------------------------------------------------------------------------------------------------|---------------------------|--------------|----------------------|--------------------|--------------|----------------------|
|                                                                                                                                                                               | No. patients              | No. episodes | Episode per patient* | No. patients       | No. episodes | Episode per patient* |
| <b>Outpatient</b>                                                                                                                                                             |                           |              |                      |                    |              |                      |
| Maxillo-Facial Surgery first visit                                                                                                                                            | 25                        | 6            | 0.240                | 23                 | 9            | 0.391                |
| Maxillo-Facial Surgery follow-up visit                                                                                                                                        | 25                        | 18           | 0.720                | 23                 | 30           | 1.304                |
| - Follow-up 1                                                                                                                                                                 | 25                        | 6            | 0.240                | 23                 | 9            | 0.391                |
| - Follow-up 2                                                                                                                                                                 | 25                        | 6            | 0.240                | 23                 | 9            | 0.391                |
| - Unscheduled visit                                                                                                                                                           | 25                        | 6            | 0.240                | 23                 | 12           | 0.521                |
| ENT first visit                                                                                                                                                               | 25                        | 19           | 0.760                | 23                 | 14           | 0.609                |
| ENT follow-up visit                                                                                                                                                           | 25                        | 46           | 1.840                | 23                 | 42           | 1.826                |
| - Follow-up 1                                                                                                                                                                 | 25                        | 19           | 0.760                | 23                 | 14           | 0.609                |
| - Follow-up 2                                                                                                                                                                 | 25                        | 18           | 0.720                | 23                 | 12           | 0.521                |
| - Unscheduled visit                                                                                                                                                           | 25                        | 9            | 0.360                | 23                 | 16           | 0.696                |
| <b>Surgery</b>                                                                                                                                                                |                           |              |                      |                    |              |                      |
| T851 Block dissection of cervical lymph nodes                                                                                                                                 | 25                        | 10           | 0.400                | 23                 | 9            | 0.391                |
| F382 Excision of lesion of mouth NEC;<br>T851 Block dissection of cervical lymph nodes                                                                                        | 25                        | 1            | 0.040                | 23                 | 2            | 0.087                |
| E231 Open excision of lesion of pharynx; T851 Block dissection of cervical lymph nodes                                                                                        | 25                        | 12           | 0.480                | 23                 | 10           | 0.435                |
| T851 Block dissection of cervical lymph nodes;<br>T81.0 Haemorrhage and haematoma complicating a procedure, not elsewhere classified                                          | 25                        | 0            | 0.000                | 23                 | 1            | 0.043                |
| F382 Excision of lesion of mouth NEC;<br>T851 Block dissection of cervical lymph nodes;<br>T81.0 Haemorrhage and haematoma complicating a procedure, not elsewhere classified | 25                        | 1            | 0.040                | 23                 | 0            | 0.000                |
| E231 Open excision of lesion of pharynx; T851 Block dissection of cervical lymph nodes; T81.0 Haemorrhage and haematoma complicating a procedure, not elsewhere classified    | 25                        | 1            | 0.040                | 23                 | 1            | 0.043                |
| Additional bed days                                                                                                                                                           | 25                        | 1            | 0.040                | 23                 | 1            | 0.043                |
| Artiss                                                                                                                                                                        | 25                        | 25           | 1.000                | 23                 | 0            | 0.000                |
| Number of complications                                                                                                                                                       | 25                        | 10           | 0.400                | 23                 | 14           | 0.609                |

\*=values have been reweighted to include all patients in the treatment arm.

**Table S3: Mean cost per patient per treatment arm**

| Resource                                                                                                                                                                   | Interventional Arm<br>(n=25) | Control Arm<br>(n=23) |
|----------------------------------------------------------------------------------------------------------------------------------------------------------------------------|------------------------------|-----------------------|
| <b>Outpatient</b>                                                                                                                                                          |                              |                       |
| Maxillo-Facial Surgery first visit                                                                                                                                         | £35.52                       | £57.48                |
| Maxillo-Facial Surgery follow-up visit                                                                                                                                     | £47.52                       | £86.06                |
| ENT first visit                                                                                                                                                            | £91.96                       | £73.69                |
| ENT follow-up visit                                                                                                                                                        | £95.68                       | £94.95                |
| <b>Total outpatient cost per patient</b>                                                                                                                                   | <b>£270.68</b>               | <b>£312.18</b>        |
| <b>Surgery</b>                                                                                                                                                             |                              |                       |
| T851 Block dissection of cervical lymph nodes                                                                                                                              | £1,282.80                    | £1,234.39             |
| F382 Excision of lesion of mouth NEC; T851 Block dissection of cervical lymph nodes                                                                                        | £126.28                      | £274.66               |
| E231 Open excision of lesion of pharynx; T851 Block dissection of cervical lymph nodes                                                                                     | £3,601.92                    | £3,264.24             |
| T851 Block dissection of cervical lymph nodes; T81.0 Haemorrhage and haematoma complicating a procedure, not elsewhere classified                                          | £0                           | £164.05               |
| F382 Excision of lesion of mouth NEC; T851 Block dissection of cervical lymph nodes; T81.0 Haemorrhage and haematoma complicating a procedure, not elsewhere classified    | £152.60                      | £0                    |
| E231 Open excision of lesion of pharynx; T851 Block dissection of cervical lymph nodes; T81.0 Haemorrhage and haematoma complicating a procedure, not elsewhere classified | £452.60                      | £486.55               |
| <b>Total surgery cost per patient</b>                                                                                                                                      | <b>£5616.20</b>              | <b>£5423.89</b>       |
| Additional bed days                                                                                                                                                        | £10.60                       | £11.52                |
| Artiss                                                                                                                                                                     | 98.23                        | 0                     |
| <b>Total cost per patient</b>                                                                                                                                              | <b>5,995.71</b>              | <b>£5,747.59</b>      |

### **Incremental Cost Effectiveness Ratio (ICER) Calculations**

| Resource                   | Interventional Arm (n=25) |              |                      | Control Arm (n=23) |              |                      |
|----------------------------|---------------------------|--------------|----------------------|--------------------|--------------|----------------------|
|                            | No. patients              | No. episodes | Episode per patient* | No. patients       | No. episodes | Episode per patient* |
| Complication               | 25                        | 10           | 0.400                | 23                 | 14           | 0.609                |
| Bed days                   | 25                        | 73           | 2.920                | 23                 | 78           | 3.391                |
| Length of surgery (median) | 25                        |              | 2.467                | 23                 |              | 2.050                |

#### **Difference in cost per patient**

The Interventional arm costs £248.12 more per patient than the control arm.

#### **Difference in complications**

The control arm had 0.209 more complications per patient than the interventional arm.

#### **Difference in bed days**

Patients in the control arm stayed 0.471 days per patient longer than the interventional arm.

#### **Difference in length of surgery**

Patients in the interventional arm took a median of 0.417 hours (approximately 25 minutes) longer in surgery than in the control arm.

$$\begin{aligned}\text{Complications ICER} &= £248.12 / 0.209 \\ &= £1,187.17 \text{ per complication prevented}\end{aligned}$$

$$\begin{aligned}\text{Bed days ICER} &= £248.12 / 0.471 \\ &= £526.79 \text{ per bed day saved}\end{aligned}$$

FS costs more, does more and lies in the upper right quadrant of the 'cost-effectiveness plane'. The origin of the 'cost-effectiveness plane' is the control arm. Based on an excess bed day valued at £265, a cost of £526.79 per bed day saved does not seem cost-effective. It is also noted that patients in interventional spent a longer time in surgery.

The excess costs due to complications in this study manifested as unscheduled outpatient visits, higher NHS tariffs because of returns to theatre and excess bed days. On an individual patient level, some minor complications did not incur any financial cost, whereas the most severe complication incurred an excess cost of £3,915. Whether the complication ICER of £1,187.17 per complication prevented represents, value for money is difficult to answer. This is because complications are associated with physical, psychological and social costs to the patient that has not been quantified in this analysis. One must accept that this calculation is fundamentally flawed as it is based on NHS tariffs and does not consider how quickly patients returned to work or their usage of community healthcare. On this basis, no firm conclusions can be made regarding the cost-effectiveness of FS. A definitive RCT should include patient diaries to record absenteeism from work and community healthcare usage. Patients should also be followed up for longer so that they may complete the EQ-5D questionnaire to enable the calculation of ICER based on quality-adjusted life years (QALYs). If patients are followed up for longer, adjuvant treatment (RT/CRT) costs would also need to be included in the analysis. This would undoubtedly "muddy the water" but is justified within a randomised pragmatic trial design.
